# Supplementary material for: (Z)-Endoxifen and Early Recurrence of Breast Cancer: An Explorative Analysis in a Prospective Brazilian Study
Source: MDPI journal article supplement (doi:10.3390/jpm12040511), 2022-03-22
Supplement: s1 [file s1]

**Supplementary Table S1.** Univariate Cox regression analyses for an association of factors with event-free survival.

| Variable(s)               | Value                   | Total<br>(n) | Events<br>[n (%)] | HR            | 95% CI     | p      |
|---------------------------|-------------------------|--------------|-------------------|---------------|------------|--------|
| Age (years)               | ≥ 69                    | 28           | 7 (25)            | 1 (Reference) |            |        |
|                           | 50–69                   | 59           | 7 (11.9)          | 0.61          | 0.24–1.57  | 0.31   |
|                           | ≤49                     | 61           | 11 (18)           | 0.38          | 0.13–1.08  | 0.07   |
| Stage                     | I                       | 50           | 3 (6.0)           | 1 (Reference) |            |        |
|                           | II                      | 74           | 12 (16.2)         | 2.88          | 0.81–10.24 | 0.10   |
|                           | III                     | 24           | 10 (41.7)         | 10.38         | 2.82–38.14 | <0.001 |
| Molecular subtype         | Luminal A               | 48           | 5 (10.4)          | 1 (Reference) |            |        |
|                           | Luminal B               | 82           | 16 (19.5)         | 2.11          | 0.77–5.76  | 0.14   |
|                           | HER2                    | 18           | 4 (22.2)          | 2.14          | 0.57–7.98  | 0.26   |
| Ki67 (%)                  | ≤14                     | 49           | 5 (10.2)          | 1 (Reference) |            |        |
|                           | >14                     | 99           | 20 (20.2)         | 2.21          | 0.83–5.89  | 0.11   |
| CYP2D6 phenotype<br>class | EM/UM                   | 97           | 19 (19.6)         | 1 (Reference) |            |        |
|                           | IM/PM                   | 52           | 6 (11.5)          | 0.53          | 0.21–1.33  | 0.18   |
| Chemotherapy              | No                      | 55           | 8 (14.5)          | 1 (Reference) |            |        |
|                           | Yes                     | 94           | 17 (18.1)         | 1.25          | 0.54–2.90  | 0.60   |
| BMI (kg/m <sup>2</sup> )  | ≤30                     | 61           | 10 (16.4)         | 1 (Reference) |            |        |
|                           | >30                     | 26           | 5 (19.2)          | 1.32          | 0.45–3.87  | 0.61   |
| Adherence                 | Low                     | 16           | 1 (6.3)           | 1 (Reference) |            |        |
|                           | High/ Intermedi-<br>ary | 116          | 19 (16.4)         | 2.91          | 0.39–22.07 | 0.291  |

**Supplementary Table S2.** CYP2D6 alleles and their interpretation, activity scores, and CYP2D6 phenotypes.

| CYP2D6 genotypes       |                               | CYP2D6 phenotypes     |                  |
|------------------------|-------------------------------|-----------------------|------------------|
| Alleles (haplotypes)   | Enzymatic activity of alleles | CYP2D6 activity score | CYP2D6 phenotype |
| *1XN                   | UM                            | UM/EM (3.0)           | UM               |
| *1, *2                 | EM                            | EM/EM (2.0)           | EM               |
|                        |                               | EM/IM (1.5)           |                  |
| *9, *10, *17, *29, *41 | IM                            | EM/PM (1.0)           | IM               |
|                        |                               | IM/IM (0.75)          |                  |
|                        |                               | PM/IM (0.5)           |                  |
| *3, *4, *5, *6, *7, *8 | PM                            | PM/PM (0.0)           | PM               |

Abbreviations: \*1XN, gene duplication; UM, ultrarapid metabolizer; EM, extensive metabolizer; IM, intermediate metabolizer; PM, poor metabolizer.

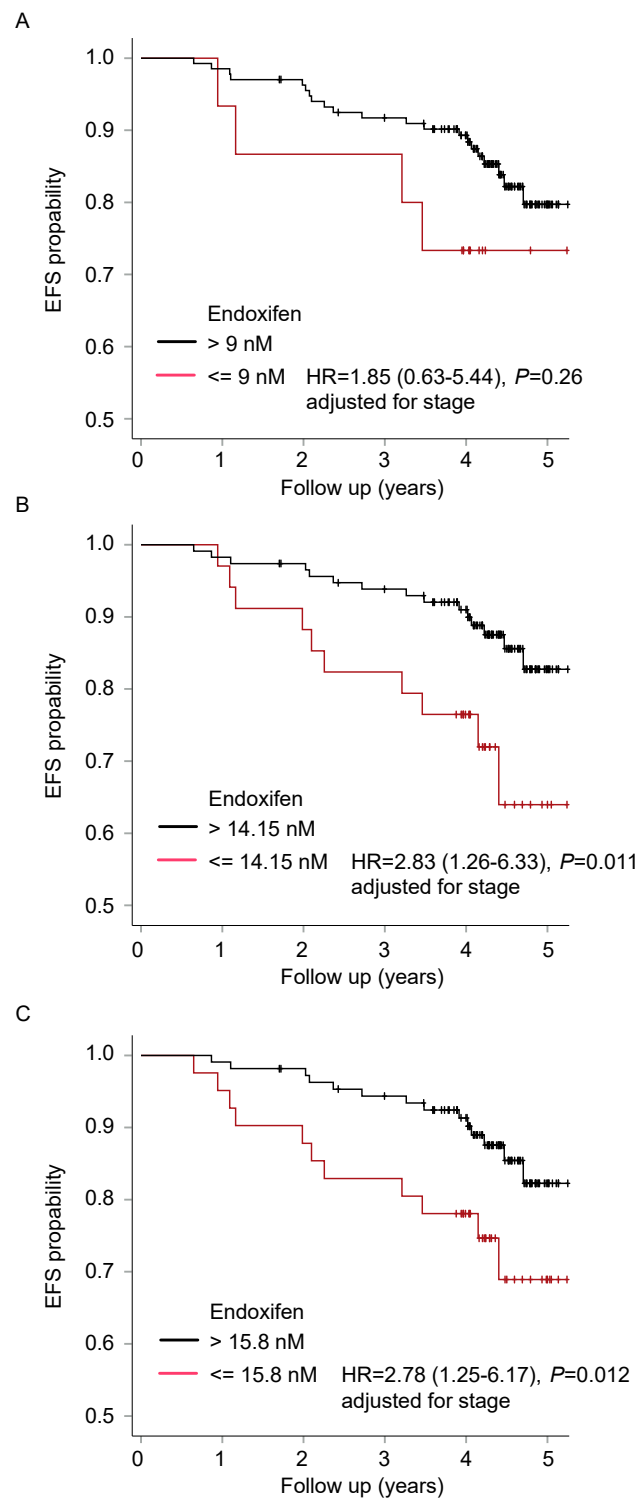

**Supplementary Figure S1.** Kaplan-Meier curves of (Z)-endoxifen stratified by three thresholds reported from literature. (A) 9 nM [10]; (B) 14.15 nM [9]; (C) 15.8 nM [11]. Hazard ratios and 95% confidence intervals (given in brackets) for below versus above threshold were calculated by multivariate Cox proportional hazard regression, adjusted for stage.
